# Supplementary material for: Controlling Trophoblast Cell Fusion in the Human Placenta—Transcriptional Regulation of Suppressyn, an Endogenous Inhibitor of Syncytin-1
Source: MDPI journal article supplement (doi:10.3390/biom13111627), 2023-11-07
Supplement: s1 [file s1]

Supplementary Figure S1

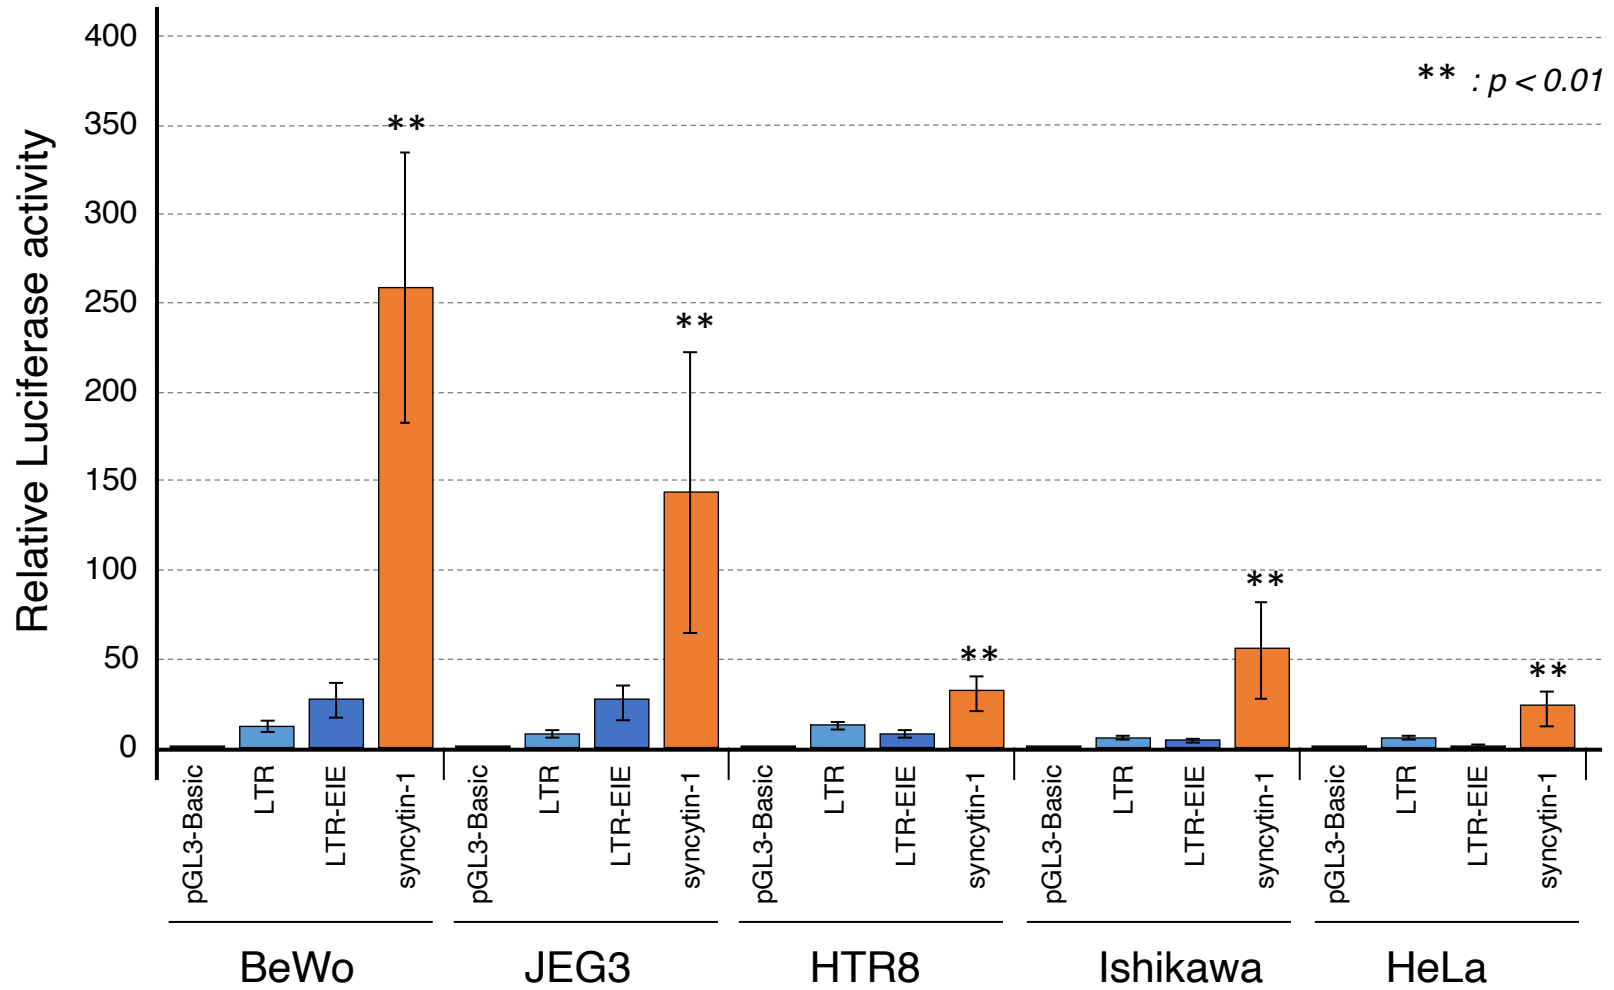

## Supplementary Figure S2

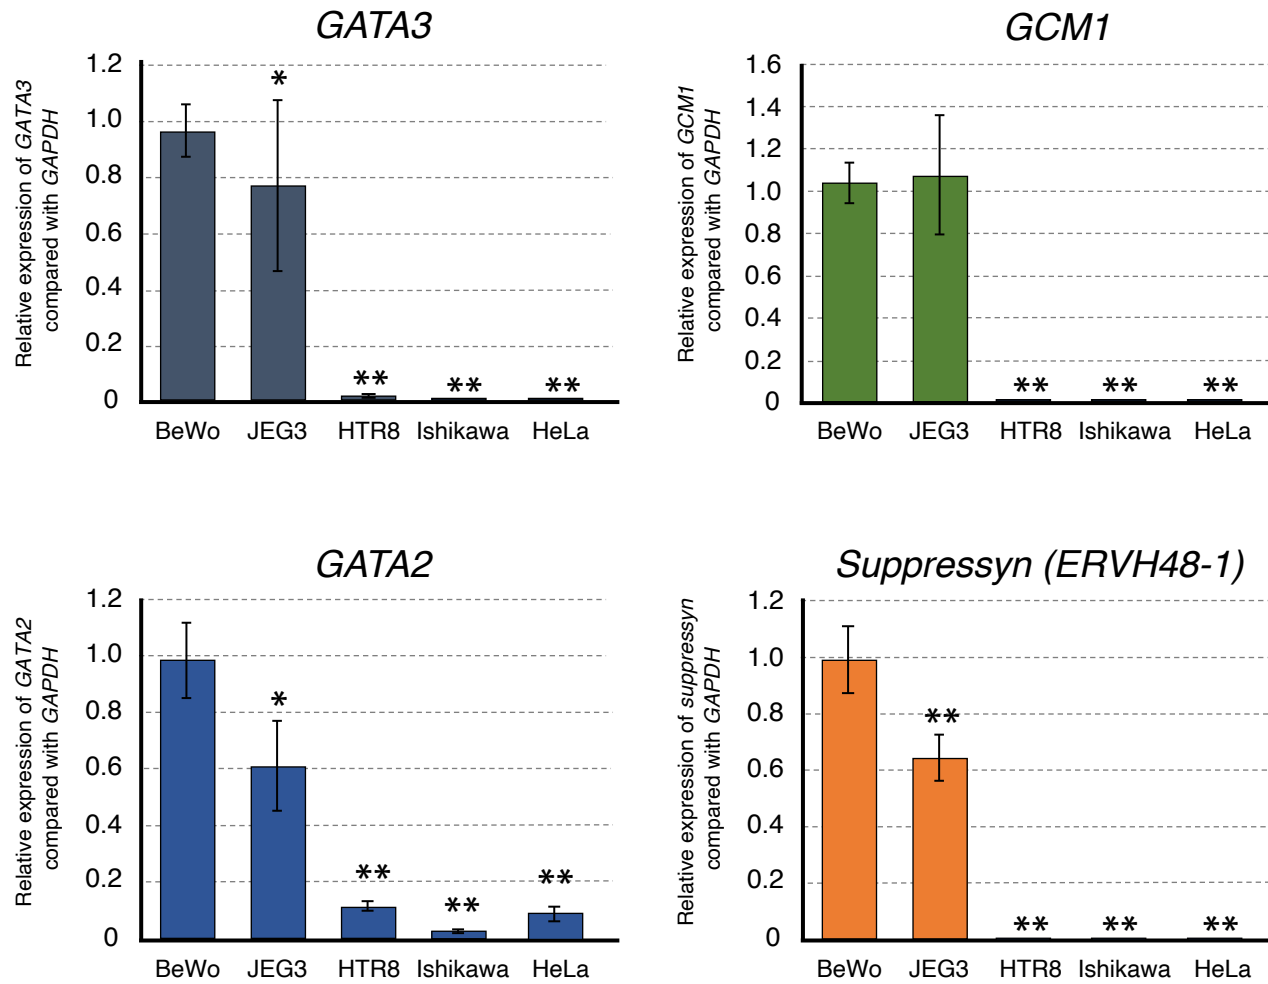

\* :  $p < 0.05$  \*\* :  $p < 0.01$

# Supplementary Figure S3

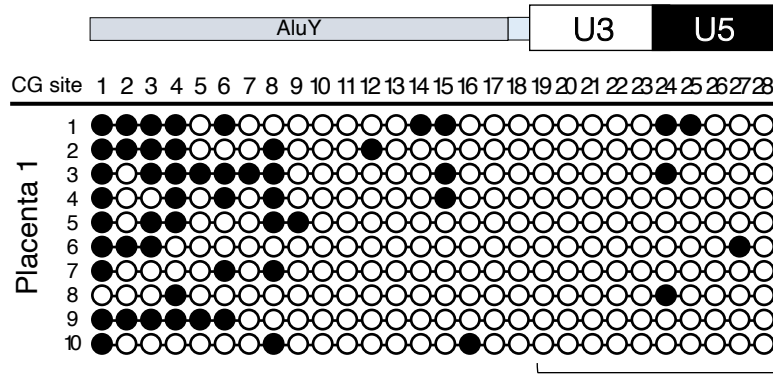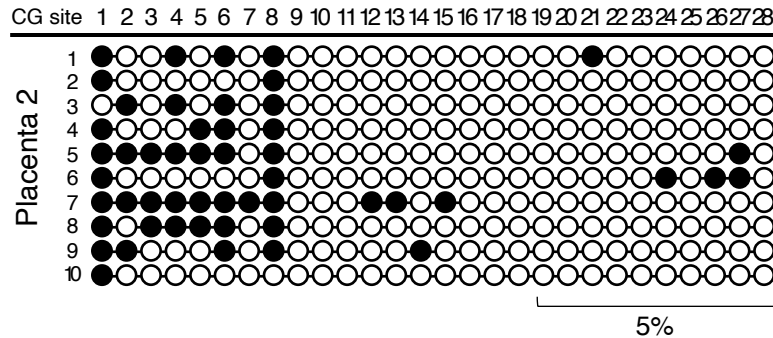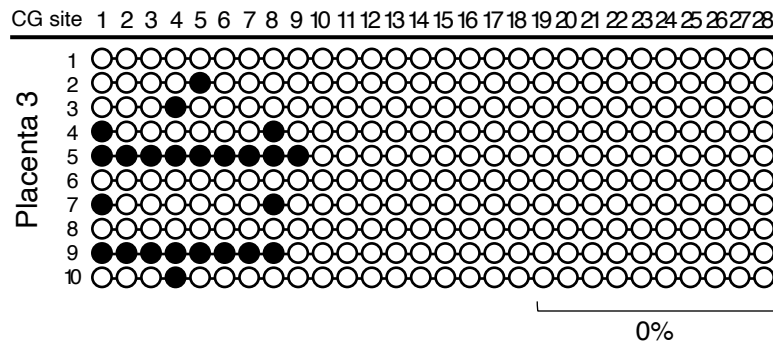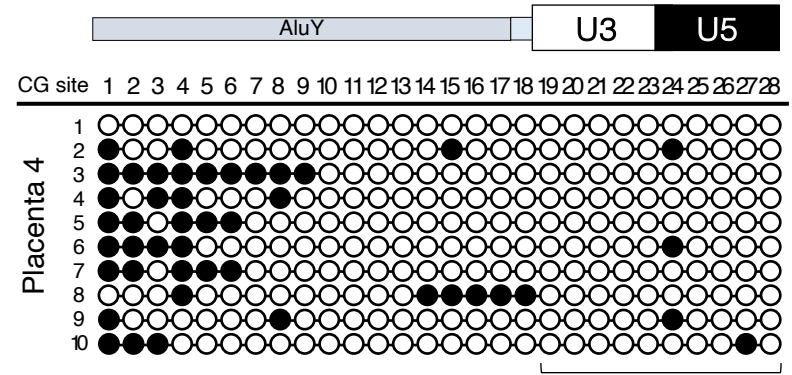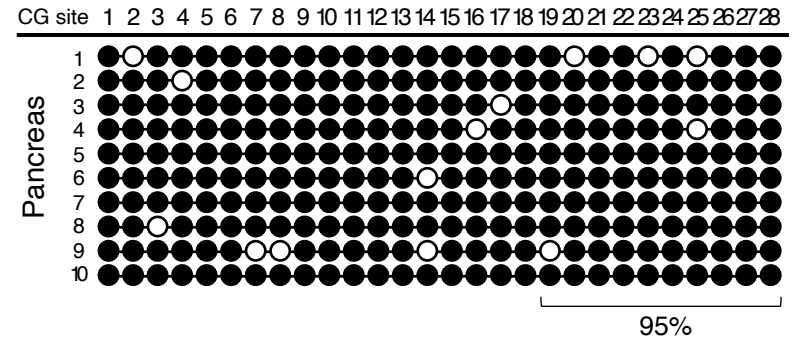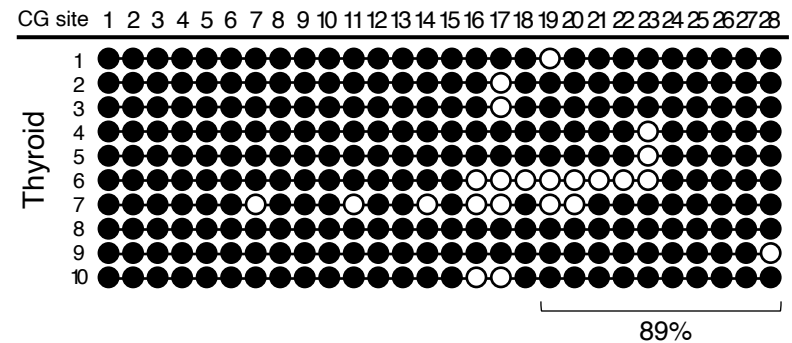

○ Un-methylated  
● methylated

# Supplementary Figure S4

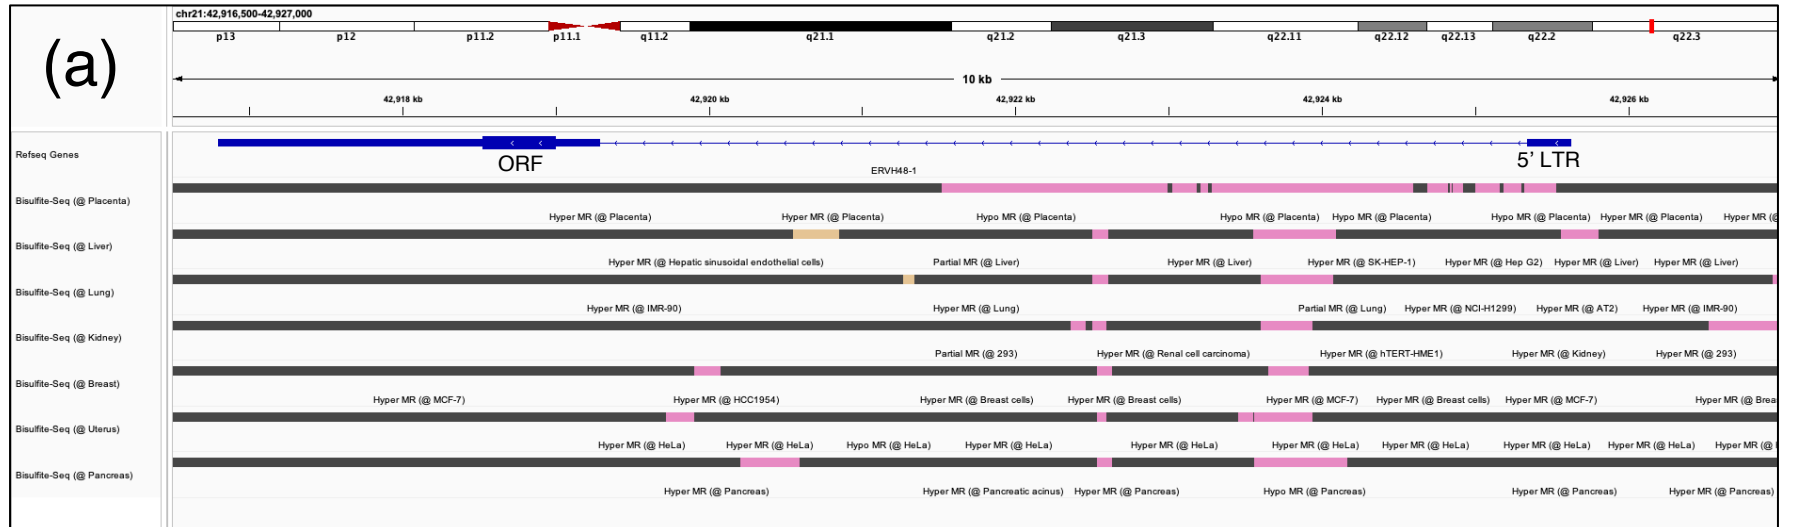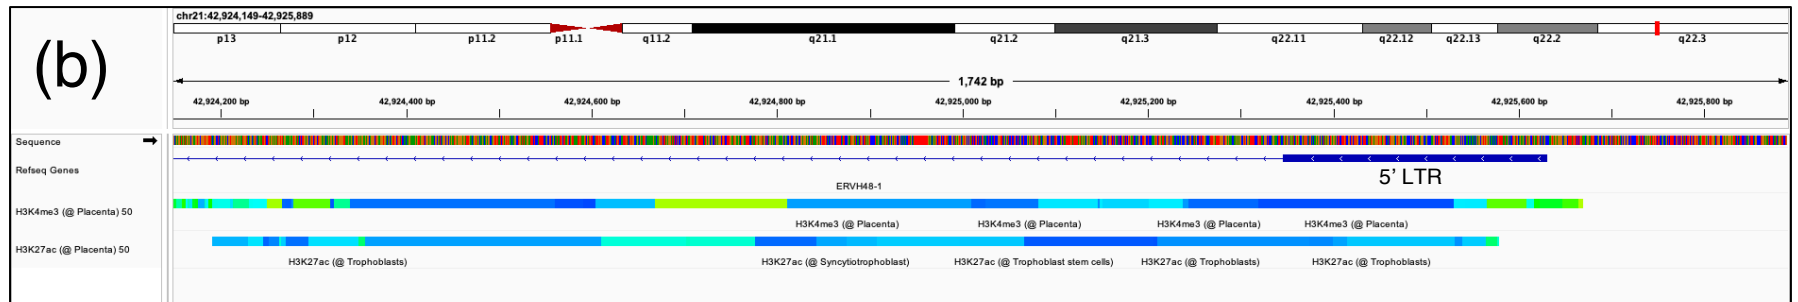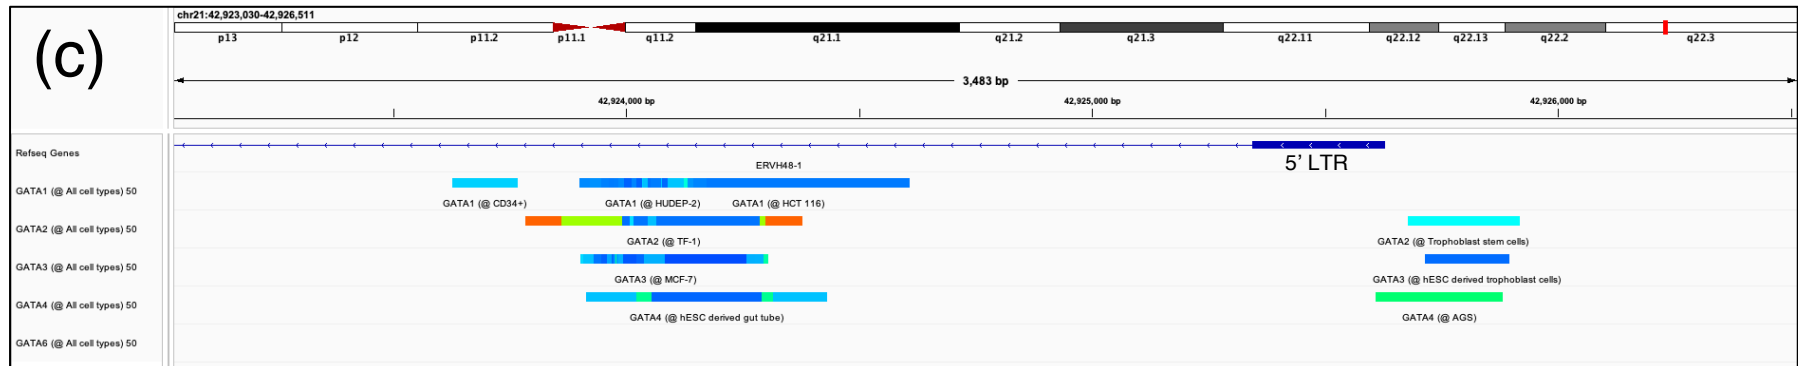

## Supplementary Figure S5

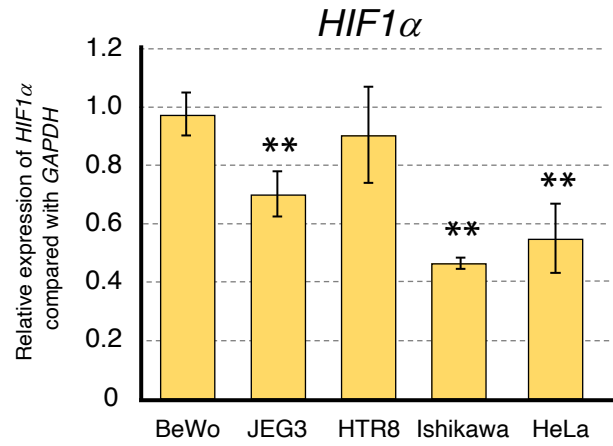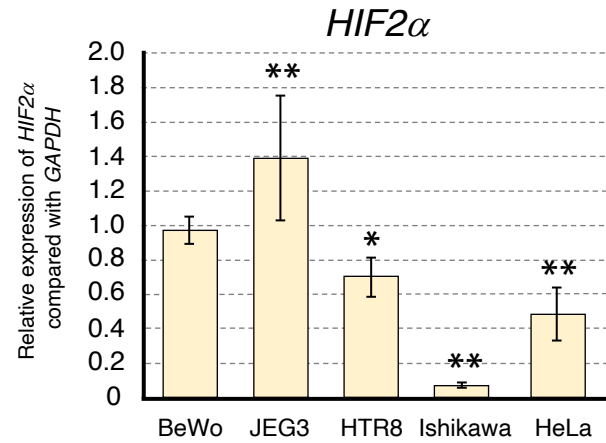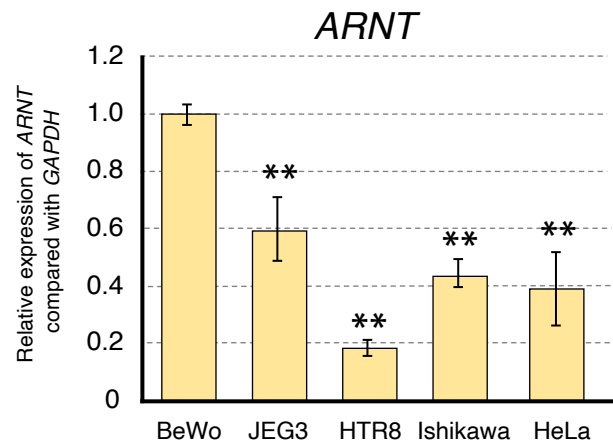

\* :  $p < 0.05$     \*\* :  $p < 0.01$

## Supplementary Figure S6

### BeWo cells

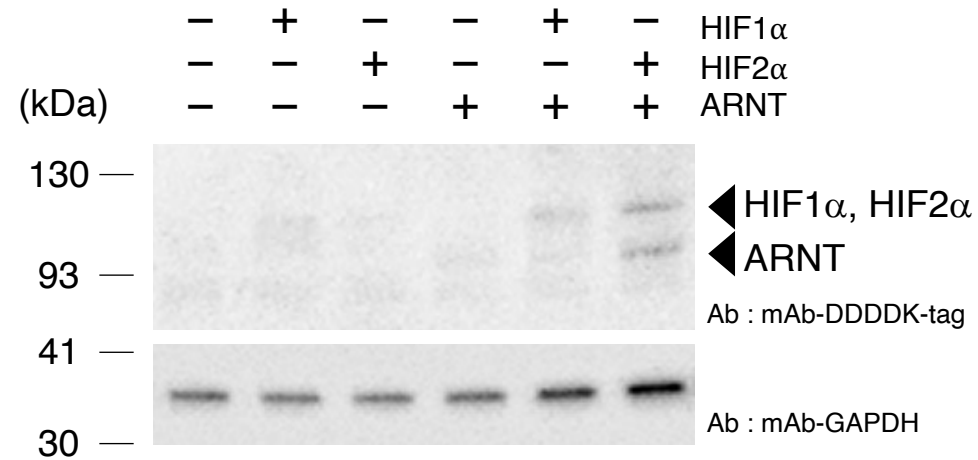

Supplementary Figure S7

BeWo cells

|       |   |   |   |   |   |   |       |   |   |   |   |   |   |
|-------|---|---|---|---|---|---|-------|---|---|---|---|---|---|
| HIF1α | - | + | - | - | + | - | HIF1α | - | + | - | - | + | - |
| HIF2α | - | - | + | - | - | + | HIF2α | - | - | + | - | - | + |
| ARNT  | - | - | - | + | + | + | ARNT  | - | - | - | + | + | + |

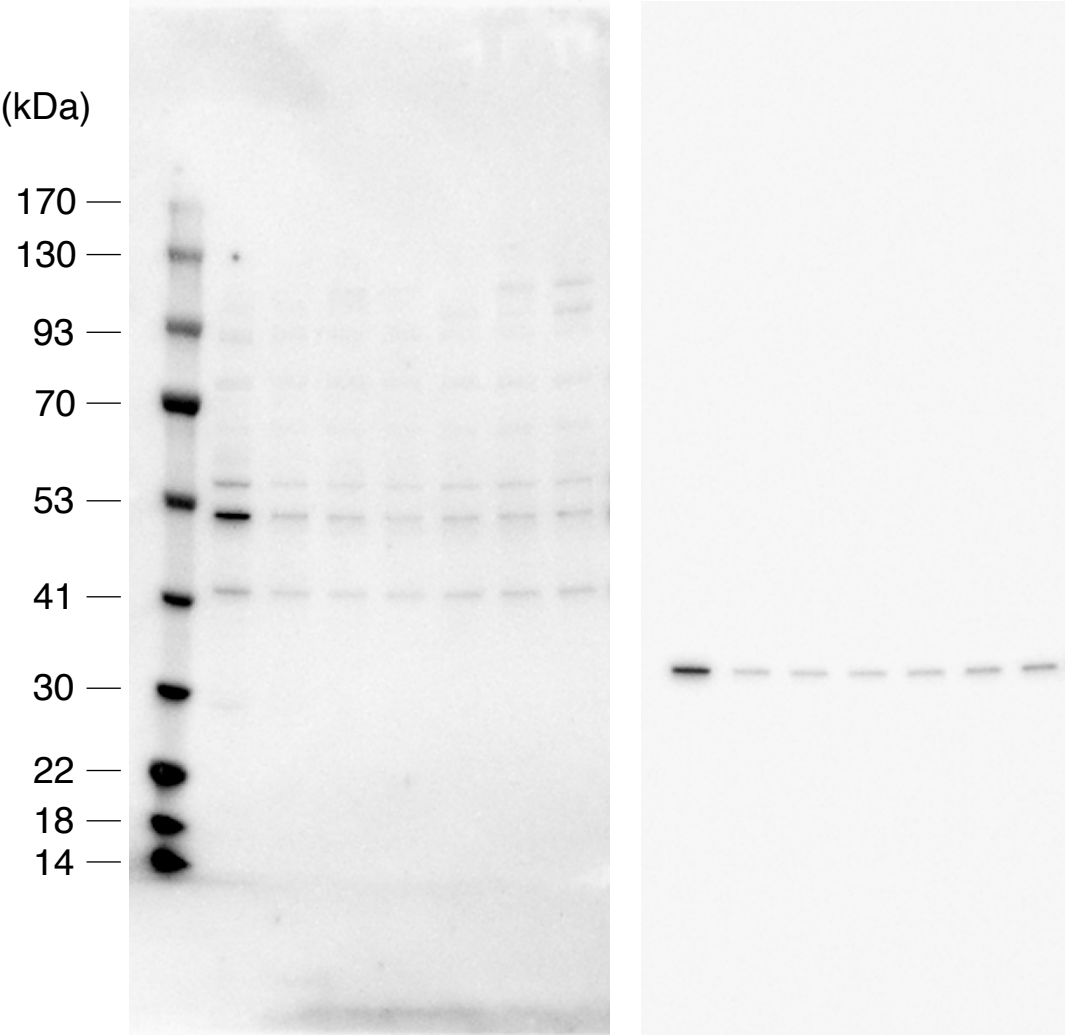

Ab : mAb-D4DDDK-tag

Ab : mAb-GAPDH

# Supplementary Table S1

|                      | Gene                                     | Primer ID                                                                                                                                                                                                    | sequence (5' - 3')                                                                                                                                                                                                                                                                                     |
|----------------------|------------------------------------------|--------------------------------------------------------------------------------------------------------------------------------------------------------------------------------------------------------------|--------------------------------------------------------------------------------------------------------------------------------------------------------------------------------------------------------------------------------------------------------------------------------------------------------|
| qPCR                 | <i>suppressyn</i><br>( <i>ERVH48-1</i> ) | SUPYN-S<br>SUPYN-AS                                                                                                                                                                                          | GAAGCTCCTCAGCCTCTAGT<br>GGGTCAGTTTGGCCGATAAA                                                                                                                                                                                                                                                           |
|                      | <i>ARNT</i>                              | ARNT-S<br>ARNT-AS                                                                                                                                                                                            | GGAATGGACTTGGCTCTGTAA<br>GTCATCATCTGGGAGGGAAAC                                                                                                                                                                                                                                                         |
|                      | <i>GCM1</i>                              | GCM-S<br>GCM-AS                                                                                                                                                                                              | AGAAGCTGAGGCAAGAAGAG<br>GACTTTGTGTTTCACCTGGAAG                                                                                                                                                                                                                                                         |
|                      | <i>HIF1<math>\alpha</math></i>           | HIF1a-S<br>HIF1a-AS                                                                                                                                                                                          | CAGACGATCATGCAGCTACTAC<br>CCCAGCAGTCTACATGCTAAAT                                                                                                                                                                                                                                                       |
|                      | <i>HIF2<math>\alpha</math></i>           | HIF2a-S<br>HIF2a-AS                                                                                                                                                                                          | CGCCATCATCTCTCTGGATT<br>GCTGTGGCTCCTCAACTC                                                                                                                                                                                                                                                             |
|                      | <i>GATA2</i>                             | GATA2-S<br>GATA2-AS                                                                                                                                                                                          | CCTCTACTACAAGCTGCACAAT<br>TCTTGCTCTTCTTGACTTGTT                                                                                                                                                                                                                                                        |
|                      | <i>GATA3</i>                             | GATA3-S<br>GATA3-AS                                                                                                                                                                                          | GAAGTGTGAGACCACCACAA<br>GCCTTCCTTCTTCATAGTCAGG                                                                                                                                                                                                                                                         |
| Mutagenesis          | <i>HIF</i>                               | LTR-HIFmg-S<br>LTR-HIFmg-AS                                                                                                                                                                                  | TAGCAGTCAGGCTGGGACAATTCT<br>CCAGCCTGACTGCTATGTAGTACGCG                                                                                                                                                                                                                                                 |
| Bisulfite sequencing | <i>suppressyn</i><br>( <i>ERVH48-1</i> ) | BS-supyn-S<br>BS-supyn-AS                                                                                                                                                                                    | GGATGTGGAAAATTTGAGATAGG<br>AAAACCAACCCCAAACTCTTAC                                                                                                                                                                                                                                                      |
| Gene cloning         | <i>HIF1<math>\alpha</math></i>           | HIF1a-1st-S<br>HIF1a-1st-AS<br>HIF1a-2nd-EcoRV-S<br>HIF1a-2nd-BamHI-AS                                                                                                                                       | ACTTGCCTTTCTTCTCTCTC<br>GCTGTCTGTGATCCAGCATT<br>CGGATATCACCGATTACCATGGAGGGCGC<br>CGGATCCGGCCAGTTAACTTGATCCAAAG                                                                                                                                                                                         |
|                      |                                          | HIF2a-1st-S<br>HIF2a-1st-AS<br>HIF2a-2nd-EcoRV-S<br>HIF2a-2nd-BamHI-AS                                                                                                                                       | GTTCTCCAGTCACCTTTC<br>GCTGGCGTTAGAAATACCTAGT<br>GGATATCGTGCTCGGCGTCTGAAC<br>CGGATCCGGCCAGGTGGCCTGGTCCAG                                                                                                                                                                                                |
|                      | <i>ARNT</i>                              | ARNT-1st-S<br>ARNT-1st-AS<br>ARNT-2nd-EcoRV-S<br>ARNT-2nd-BamHI-AS                                                                                                                                           | GTGGCGCGGCGGCGGTGGCATCTGCGGCC<br>CACACTCTCTCACTTACTC<br>GGATATCGGCGGTGGCATCTGCGGCCATGG<br>CGGATCCGGGTATTCTGAAAAGGGGGGAA                                                                                                                                                                                |
|                      |                                          |                                                                                                                                                                                                              |                                                                                                                                                                                                                                                                                                        |
|                      | <i>suppressyn</i><br>( <i>ERVH48-1</i> ) | Pro-SUPYN-1st-S (EIE-1st-S)<br>Pro-SUPYN-1st-AS (5Enh-1st-AS)<br>Alu-LTR-2nd-Kpn-S<br>MER-LTR-2nd-kpn-S<br>LTR-2nd-kpn-S<br>LTR-2nd-Xho-AS<br>EIE-1st-AS<br>EIE-2nd-XhoI-AS<br>5Enh-1st-S<br>5Enh-2nd-KpnI-S | GTGCGGATGTGAAAATCTGAGA<br>TCGCAGGTTTCAGGGCCAGCCCA<br>GGGTACCGAGATGGAGGCTCGTCTGTCTG<br>GGGTACCGAGACAGGTCTCTTGTTAATTTA<br>GGGTACCTGAAAGATTCTCCAGGGGCCTG<br>GCTCGAGAAGGCTCTTGCAATTGGTTGG<br>GCTGGGTCTAGGTTGGTATATTT<br>ACGCCTCGAGGTCAGGACCTTGGGTGATTT<br>CATTGGCTGAGAGGTGTCTT<br>GGGTACCGCCGTCCCCAGCTTGTC |
|                      |                                          | <i>syncytin-1</i><br>Syn1-KpnI-S<br>Syn1-BglII-AS                                                                                                                                                            | AAGGTACCTATGTATTACCATAATTAGGCAGC<br>AAAGATCTAATAGAGTGAAATAGCATGAAAACAGC                                                                                                                                                                                                                                |
